# Supplementary material
Source: PubMed Central journal article supplement (PMC3416095)
Supplement: CVI.00282-12_zcd999094502so1.pdf [file CVI.00282-12_zcd999094502so1.pdf]

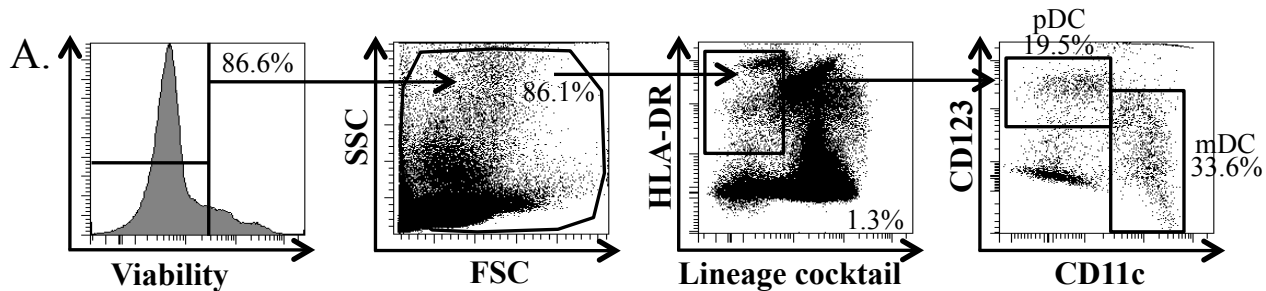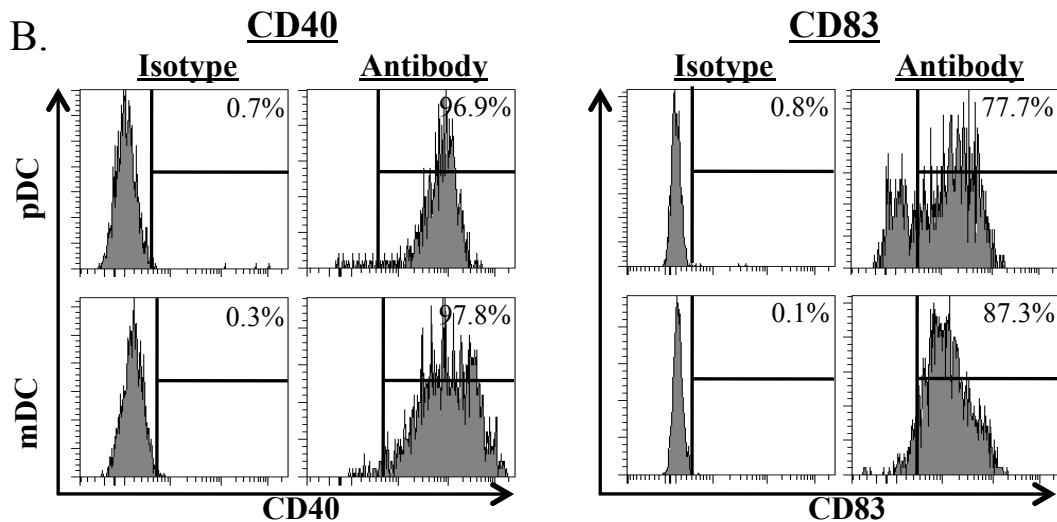

**Supplemental Figure 1. Representative flow plots demonstrating the gating strategy used to identify myeloid and plasmacytoid DC and evaluate activation of these subsets. Multi-color flow cytometry was used to identify plasmacytoid DC (pDC) and myeloid DC (mDC) within total PBMC. (A) Total DC were identified within viable cells as lineage cocktail<sup>-</sup>HLA-DR<sup>+</sup>. mDC and pDC were further defined as CD123<sup>low</sup>CD11c<sup>+</sup> (mDC) and CD123<sup>high</sup>CD11c<sup>-</sup> (pDC). (B) Representative flow plots depicting CD40 and CD83 expression on pDC and mDC after stimulation with *B. fragilis*. Gates were set using an isotype control.**
