# Supplementary material
Source: PubMed Central journal article supplement (PMC3416095)
Supplement: CVI.00282-12_zcd999094502so2.pdf [file CVI.00282-12_zcd999094502so2.pdf]

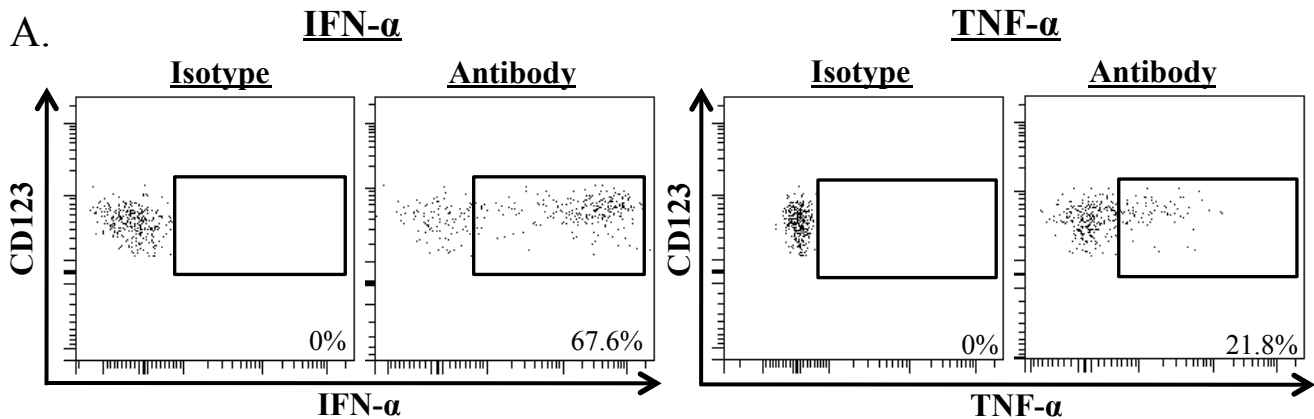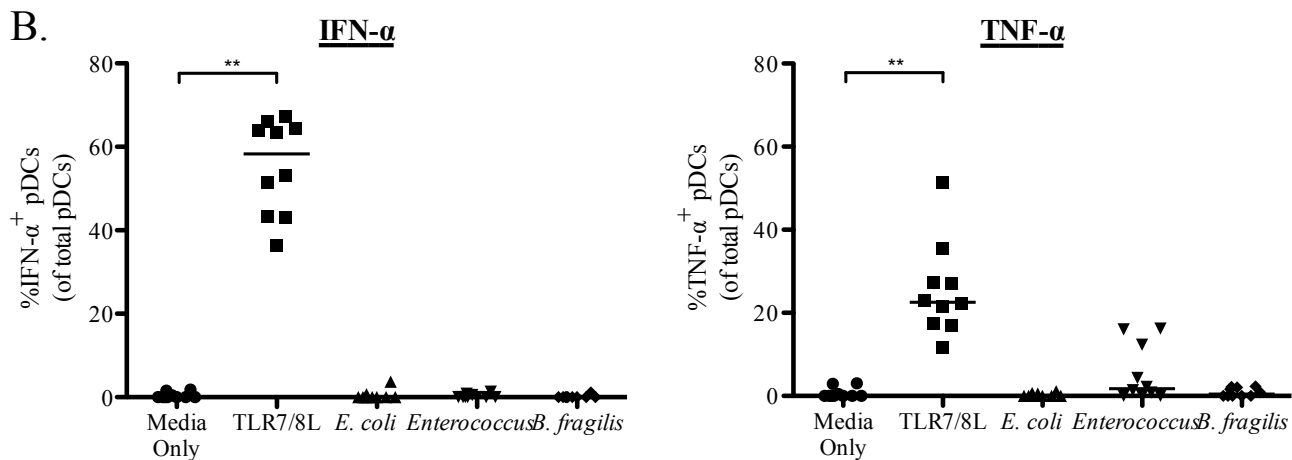

**Supplemental Figure 2. Blood pDC do not produce IL-12p40/70, IL-10, IFN- $\alpha$  or TNF- $\alpha$  in response to commensal bacterial stimulation.** Total PBMC were stimulated with bacteria and multi-color flow cytometry was used to assess expression of cytokines by pDC. (A) Representative flow plots illustrating intracellular cytokine expression within pDC in response to TLR7/8L. Gates for cytokine production were set using an isotype control. (B) Percent of pDC expressing intracellular TNF- $\alpha$  and IFN- $\alpha$  in response to stimulation with TLR7/8L (used as a positive control), *E. coli*, *Enterococcus*, or *B. fragilis* (n=10). pDC expression of IL-12p40/70 and IL-10 was not detected in any assay. Results are shown as the percent of total pDC positive for expression of the indicated cytokine with background (isotype staining) subtracted from the antibody value. Bars indicate median value. Statistical significance for each stimulation condition compared to the media only condition was evaluated using the Wilcoxon matched-pairs signed rank test. \*\* = p < 0.01.
