# Supplementary material
Source: PubMed Central journal article supplement (PMC3416095)
Supplement: CVI.00282-12_zcd999094502so3.pdf [file CVI.00282-12_zcd999094502so3.pdf]

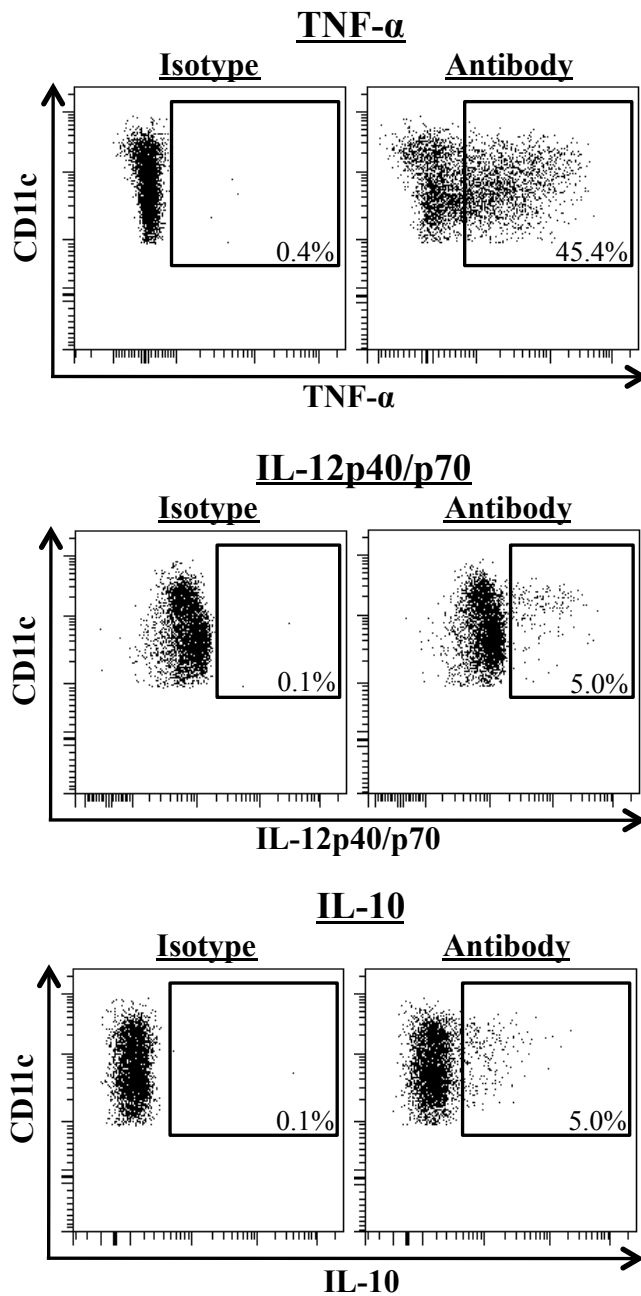

**Supplemental Figure 3. Representative flow plots depicting mDC cytokine production.** Representative flow plots illustrating intracellular cytokine expression within mDC in response to *E. coli*. Gates for cytokine production were set using an isotype control.
