# Supplementary material
Source: PubMed Central journal article supplement (PMC3416095)
Supplement: CVI.00282-12_zcd999094502so4.pdf [file CVI.00282-12_zcd999094502so4.pdf]

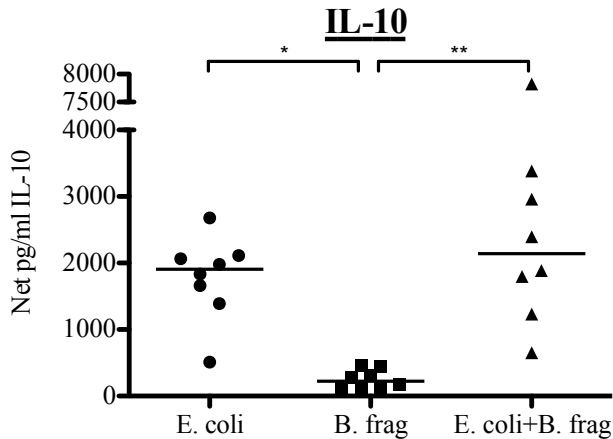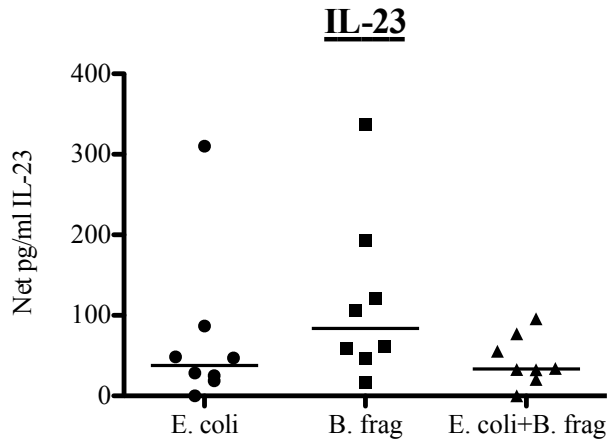

**Supplemental Figure 4. Combined *E. coli* and *B. fragilis* stimulation alters total PBMC cytokine production.** To determine if exposure to multiple bacteria would alter cytokine production, total PBMC were exposed to *E. coli* and *B. fragilis* simultaneously. Production of IL-10 and IL-23 within culture supernatants of total PBMC stimulated with *E. coli*, *B. fragilis* and *E. coli+B. fragilis* was assessed by ELISA (n=8). Results are shown as the net amount of the indicated cytokine (stimulation condition value minus the media only value). Bars indicate median value. Statistical significance between each stimulation condition was evaluated using the Friedman test. \* = p<0.05. \*\* = p<0.01.
