# Supplementary material
Source: PubMed Central journal article supplement (PMC3416095)
Supplement: CVI.00282-12_zcd999094502so5.pdf [file CVI.00282-12_zcd999094502so5.pdf]

SUPPLEMENTAL TABLE 1. Percentage of mDCs within total PBMC positive for cytokine production in response to bacterial stimulation

|                     | TNF- $\alpha^a$       |                    | IL-12p40/70 <sup>a</sup> |                    | IL-10 <sup>a</sup>  |                    |
|---------------------|-----------------------|--------------------|--------------------------|--------------------|---------------------|--------------------|
|                     | Median (Range)        | Trend <sup>b</sup> | Median (Range)           | Trend <sup>b</sup> | Median (Range)      | Trend <sup>b</sup> |
| Media               | 0.18 (0 – 1.44)       |                    | 0.003 (0 – 0.18)         |                    | 0.06 (0 – 0.4)      |                    |
| <i>E. coli</i>      | 32.63 (16.94 – 71.86) | ↑ **               | 3.84 (0.92 – 10.79)      | ↑ **               | 1.62 (0.46 – 20.24) | ↑ **               |
| <i>Enterococcus</i> | 19.68 (10.33 – 74.63) | ↑ **               | 3.55 (1.45 – 8.25)       | ↑ **               | 0.45 (0.14 – 8.99)  | ↑ **               |
| <i>B. fragilis</i>  | 24.13 (14.42 – 76.58) | ↑ **               | 10.13 (5.41 – 33.81)     | ↑ **               | 0.74 (0.24 – 9.65)  | ↑ **               |

<sup>a</sup>Values are median (range) of the percent of mDCs within total PBMC (n=10) positive for production of the indicated cytokine after 18-24 hours of culture in media alone or with *E. coli*, *Enterococcus*, or *B. fragilis* (1:5 PBMC to bacteria).

<sup>b</sup>Overall change between the stimulated condition and the media only control. Statistical significance was evaluated using the Wilcoxon matched-pairs signed rank test to compare the stimulation condition to the media only control. ↑ = increase over media only based on statistical value. \*\* = p<0.01.
