# Supplementary material
Source: PubMed Central journal article supplement (PMC3416095)
Supplement: CVI.00282-12_zcd999094502so6.pdf [file CVI.00282-12_zcd999094502so6.pdf]

SUPPLEMENTAL TABLE 2. Production of cytokines by total PBMC in response to bacterial stimulation

|                     | IL-12p70 <sup>a</sup> |                    | IL-23 <sup>a</sup> |                    | IL-10 <sup>a</sup>   |                    |
|---------------------|-----------------------|--------------------|--------------------|--------------------|----------------------|--------------------|
|                     | Median (Range)        | Trend <sup>b</sup> | Median (Range)     | Trend <sup>b</sup> | Median (Range)       | Trend <sup>b</sup> |
| Media               | 0 (0 – 12.21)         |                    | 0 (0 – 8.56)       |                    | 0 (0 – 9.2)          |                    |
| <i>E. coli</i>      | 0 (0 – 38.31)         | ↔                  | 9.14 (0 – 45.42)   | ↑ *                | 1195 (327.7 – 2536)  | ↑ **               |
| <i>Enterococcus</i> | 3.71 (0 – 10.76)      | ↔                  | 0 (0 – 75.61)      | ↔                  | 671.8 (102.4 – 2060) | ↑ **               |
| <i>B. fragilis</i>  | 28.74 (12.24 – 157.1) | ↑ **               | 141.6 (0 – 298.5)  | ↑ **               | 352.9 (78.22 – 1180) | ↑ **               |

<sup>a</sup>Values are median (range) of cytokine (pg/ml) produced by PBMC (n=10) cultured in media alone or with *E. coli*, *Enterococcus* or *B. fragilis* (1:5 PBMC to bacteria) for 18-24 hours evaluated by ELISA.

<sup>b</sup>Overall change between the stimulated condition and the media only control. Statistical significance was evaluated using the Wilcoxon matched-pairs signed rank test to compare the stimulation condition to the media only control. ↑ = increase over media only based on statistical value. ↔ = no difference to media only. \* = p<0.05. \*\* = p<0.01.
